# Supplementary material
Source: PubMed Central journal article supplement (PMC5759822)
Supplement: supp_the2017-0243_onco12295-sup-0001-suppinfo01.pdf [file supp_the2017-0243_onco12295-sup-0001-suppinfo01.pdf]

Supplemental Tables for:  
 Consensus Guideline for Use of Glucarpidase in Patients with High-Dose Methotrexate Induced Acute Kidney Injury and Delayed Methotrexate Clearance  
 Laura B. Ramsey et al.

**Table S1. Methotrexate levels in pediatric patients at specified times after the start of the HDMTX infusion.**

|            | 3g/m <sup>2</sup> |                   |                   | 1-3g/m <sup>2</sup> |                   |                   | 4g/m <sup>2</sup> |                   |                    | 5g/m <sup>2</sup>                    |                                        |                                        | >8-9g/m <sup>2</sup> |                   |                   | 10-14g/m <sup>2</sup> |                   |                   |
|------------|-------------------|-------------------|-------------------|---------------------|-------------------|-------------------|-------------------|-------------------|--------------------|--------------------------------------|----------------------------------------|----------------------------------------|----------------------|-------------------|-------------------|-----------------------|-------------------|-------------------|
|            | 3h infusion       |                   |                   | 24h infusion        |                   |                   | 24h infusion      |                   |                    | 24h infusion                         |                                        |                                        | 4h infusion          |                   |                   | 4h infusion           |                   |                   |
|            | N                 | Mean conc.        | >2 SD             | N                   | Mean conc.        | >2 SD             | N                 | Mean conc.        | >2 SD              | N                                    | Mean conc.                             | >2 SD                                  | N                    | Mean conc.        | >2 SD             | N                     | Mean conc.        | >2 SD             |
| <b>24h</b> | <sup>b</sup> 87   | <sup>b</sup> 1.17 | <sup>b</sup> 3.95 | <sup>b</sup> 43     | <sup>b</sup> 26.9 | <sup>b</sup> 81.6 | <sup>b</sup> 42   | <sup>b</sup> 57.8 | <sup>b</sup> 103.0 | <sup>a</sup> 784<br><sup>b</sup> 395 | <sup>a</sup> 109<br><sup>b</sup> 75.4  | <sup>a</sup> 206<br><sup>b</sup> 152.8 | <sup>b</sup> 73      | <sup>b</sup> 5.47 | <sup>b</sup> 29.7 | <sup>b</sup> 269      | <sup>b</sup> 8.6  | <sup>b</sup> 60.1 |
| <b>36h</b> |                   |                   |                   |                     |                   |                   |                   |                   |                    | <sup>a</sup> 790                     | <sup>a</sup> 2.9                       | <sup>a</sup> 11.9                      |                      |                   |                   |                       |                   |                   |
| <b>42h</b> |                   |                   |                   |                     |                   |                   |                   |                   |                    | <sup>a</sup> 784<br><sup>b</sup> 400 | <sup>a</sup> 1.4<br><sup>b</sup> 0.99  | <sup>a</sup> 6.9<br><sup>b</sup> 3.7   |                      |                   |                   |                       |                   |                   |
| <b>48h</b> | <sup>b</sup> 89   | <sup>b</sup> 0.17 | <sup>b</sup> 0.69 | <sup>b</sup> 40     | <sup>b</sup> 0.38 | <sup>b</sup> 1.78 | <sup>b</sup> 42   | <sup>b</sup> 0.48 | <sup>b</sup> 2.12  | <sup>a</sup> 776<br><sup>b</sup> 406 | <sup>a</sup> 0.8<br><sup>b</sup> 0.49  | <sup>a</sup> 4.4<br><sup>b</sup> 2.23  | <sup>b</sup> 73      | <sup>b</sup> 0.28 | <sup>b</sup> 0.85 | <sup>b</sup> 267      | <sup>b</sup> 0.38 | <sup>b</sup> 2.1  |
| <b>60h</b> |                   |                   |                   |                     |                   |                   |                   |                   |                    | <sup>a</sup> 562                     | <sup>a</sup> 0.46                      | <sup>a</sup> 1.9                       |                      |                   |                   |                       |                   |                   |
| <b>72h</b> | <sup>b</sup> 35   | <sup>b</sup> 0.11 | <sup>b</sup> 0.41 | <sup>b</sup> 8      | <sup>b</sup> 0.11 | <sup>b</sup> 0.30 | <sup>b</sup> 21   | <sup>b</sup> 0.16 | <sup>b</sup> 0.75  | <sup>a</sup> 237<br><sup>b</sup> 207 | <sup>a</sup> 0.50<br><sup>b</sup> 0.14 | <sup>a</sup> 2.0<br><sup>b</sup> 0.63  | <sup>b</sup> 56      | <sup>b</sup> 0.12 | <sup>b</sup> 0.34 | <sup>b</sup> 249      | <sup>b</sup> 0.11 | <sup>b</sup> 0.46 |

Pediatric MTX pharmacokinetic data adapted from <sup>a</sup>NOPHO ALL-2008 data[1, 2] and <sup>b</sup>Cincinnati Children’s Hospital Medical Center unpublished data. Other resources of pediatric methotrexate pharmacokinetic data available include St. Jude Children’s Research Hospital data[3] (<http://mtx.stjude.org>) and Children’s Oncology Group data[4]. N, number of subjects analyzed at each dose and time point. Conc, concentration tested by immunoassay. SD, standard deviation. >2SD, the MTX concentration that is equal to the 97.7<sup>th</sup> percentile, which is 2 standard deviations above the mean.

**Table S2. Methotrexate levels in adult patients at 24, 48 and 72h after the start of the HDMTX infusion.**

|            | 1-2g/m <sup>2</sup> |            |      | >2-3g/m <sup>2</sup> |            |        | >3-4g/m <sup>2</sup> |            |       | >4-6g/m <sup>2</sup> |            |       | >6g/m <sup>2</sup> |            |       |
|------------|---------------------|------------|------|----------------------|------------|--------|----------------------|------------|-------|----------------------|------------|-------|--------------------|------------|-------|
|            | N                   | Mean conc. | >2SD | N                    | Mean conc. | >2SD   | N                    | Mean conc. | >2SD  | N                    | Mean conc. | >2SD  | N                  | Mean conc. | >2 SD |
| <b>24h</b> | 18                  | 4.14       | 19.7 | 46                   | 11.39      | 42.17  | 313                  | 7.61       | 62.95 | 41                   | 3.67       | 20.09 | 65                 | 8.59       | 50.39 |
| <b>48h</b> | 18                  | 0.24       | 0.76 | 47                   | 0.62       | 1.6368 | 320                  | 0.77       | 6.71  | 42                   | 0.62       | 6.62  | 65                 | 1.31       | 13.27 |
| <b>72h</b> | 17                  | 0.11       | 0.43 | 38                   | 0.30       | 1.48   | 265                  | 0.40       | 4.6   | 28                   | 0.09       | 0.23  | 56                 | 0.40       | 3.1   |

Adult MTX pharmacokinetic data adapted from May et al after a 3-4 hour MTX infusion.[5] N, number of subjects analyzed at each dose and time point. Conc, concentration tested by immunoassay. SD, standard deviation. >2SD, the MTX level that is equal to the mean plus 2 standard deviations.

Supplemental Tables for:  
Consensus Guideline for Use of Glucarpidase in Patients with High-Dose Methotrexate Induced Acute Kidney Injury and Delayed Methotrexate Clearance  
Laura B. Ramsey et al.

**Table S3. Standard Supportive Care Measures for HDMTX Therapy**

|                              | Measure                           | Rationale                                                           | Recommendation                                                                                                                                                                              | Ref     |
|------------------------------|-----------------------------------|---------------------------------------------------------------------|---------------------------------------------------------------------------------------------------------------------------------------------------------------------------------------------|---------|
| <b>Prior to HDMTX</b>        | Urine alkalinization              | To maintain solubility of MTX in renal tubules                      | Increase urine pH to $\geq 7$ and specific gravity $\leq 1.010$ prior start of the MTX infusion                                                                                             | [6]     |
|                              | Prehydration                      | To maintain solubility of MTX in renal tubules                      | Start hydration at least 4 h prior to start of the MTX infusion                                                                                                                             | [6]     |
| <b>During HDMTX Infusion</b> | Urine alkalinization              | To maintain solubility of MTX in renal tubules                      | Maintain urine pH above 7 and specific gravity $\leq 1.010$                                                                                                                                 | [6]     |
|                              | Hyperhydration                    | To maintain solubility of MTX in renal tubules                      | Maintain continuous i.v. hyperhydration without interruption ( $\geq 2.5\text{L}/\text{m}^2$ body surface area in 24 h)                                                                     | [6]     |
|                              | Restrict co-mediations            | To avoid kidney injury and delayed MTX elimination                  | Evaluate comedications and avoid those with an adverse MTX interaction                                                                                                                      | [7-10]  |
| <b>After HDMTX</b>           | Urine alkalinization              | To maintain solubility of MTX in renal tubules                      | Maintain urine pH above 7 until MTX concentration is $< 10\ \mu\text{M}$                                                                                                                    | [6]     |
|                              | Hyperhydration                    | To maintain solubility of MTX in renal tubules                      | Maintain continuous i.v. hyperhydration without interruption ( $\geq 2.5\text{L}/\text{m}^2$ body surface area in 24 h) until MTX concentration is $< 10\ \mu\text{M}$                      | [6]     |
|                              | Monitor plasma MTX concentrations | To recognize delayed MTX elimination and to guide leucovorin dosing | Monitor plasma MTX concentrations at least from the end of the MTX infusion until MTX concentrations are below threshold according to treatment protocols (commonly $< 0.1\ \mu\text{M}$ ). | [11]    |
|                              | Monitor serum creatinine          | To recognize early kidney injury                                    | Compare serum creatinine to baseline                                                                                                                                                        |         |
|                              | Leucovorin rescue                 | To prevent MTX toxicity                                             | Leucovorin rescue is imperative and doses should be adapted to MTX concentrations according to treatment protocols                                                                          | [11-13] |

Supplemental Tables for:  
Consensus Guideline for Use of Glucarpidase in Patients with High-Dose Methotrexate Induced Acute Kidney Injury and Delayed Methotrexate Clearance  
Laura B. Ramsey et al.

3

## References

- 1 Skärby T, Jönsson P, Hjorth L, et al. High-dose methotrexate: On the relationship of methotrexate elimination time vs renal function and serum methotrexate levels in 1164 courses in 264 swedish children with acute lymphoblastic leukaemia (all). *Cancer Chemotherapy and Pharmacology* 2003;51:311-320.
- 2 Svahn T, Mellgren K, Harila-Saari A, et al. Delayed elimination of high-dose methotrexate and use of carboxypeptidase g2 in pediatric patients during treatment for acute lymphoblastic leukemia. *Pediatr Blood Cancer* 2016
- 3 Ramsey LB, Bruun GH, Yang W, et al. Rare versus common variants in pharmacogenetics: Slco1b1 variation and methotrexate disposition. *Genome Research* 2012;22:1-8.
- 4 Ramsey LB, Panetta JC, Smith C, et al. Genome-wide study of methotrexate clearance replicates SLCO1B1. *Blood* 2013;121:898-904.
- 5 May J, Carson KR, Butler S, et al. High incidence of methotrexate associated renal toxicity in patients with lymphoma: A retrospective analysis. *Leukemia & Lymphoma* 2014;55:1345-1349.
- 6 Sasaki K, Tanaka J, Fujimoto T. Theoretically required urinary flow during high-dose methotrexate infusion. *Cancer Chemother Pharmacol* 1984;13:9-13.
- 7 Ronchera CL, Hernandez T, Peris JE, et al. Pharmacokinetic interaction between high-dose methotrexate and amoxicillin. *Ther Drug Monit* 1993;15:375-379.
- 8 Thyss A, Milano G, Kubar J, et al. Clinical and pharmacokinetic evidence of a life-threatening interaction between methotrexate and ketoprofen. *Lancet* 1986;1:256-258.
- 9 de Miguel D, García-Suárez J, Martín Y, et al. Severe acute renal failure following high-dose methotrexate therapy in adults with haematological malignancies: A significant number result from unrecognized co-administration of several drugs. *Nephrology Dialysis Transplantation* 2008;23:3762-3766.
- 10 Troger U, Stotzel B, Martens-Lobenhoffer J, et al. Drug points: Severe myalgia from an interaction between treatments with pantoprazole and methotrexate. *BMJ* 2002;324:1497.
- 11 Messmann R and Allegra C. *Antifolates*: Lippincott Williams & Wilkins, PA, USA, 2001, 139-184.
- 12 Skärby TC, Anderson H, Heldrup J, et al. High leucovorin doses during high-dose methotrexate treatment may reduce the cure rate in childhood acute lymphoblastic leukemia. *Leukemia* 2006;20:1955-1962.
- 13 Cohen JJ. Progression of osteosarcoma after high-dose methotrexate: Over-rescue by folinic acid. *Pediatr Hematol Oncol* 2003;20:579-581.
